# Supplementary material for: Transcriptome Profiling of Circulating Tumor Cells to Predict Clinical Outcomes in Metastatic Castration-Resistant Prostate Cancer
Source: MDPI journal article supplement (doi:10.3390/ijms24109002), 2023-05-19
Supplement: s1 [file s1]

## Supplementary Tables

| Table S1. CTC transcriptome gene panel |                                                                                                  |
|----------------------------------------|--------------------------------------------------------------------------------------------------|
| Gene                                   | Relevance to PCa                                                                                 |
| <i>ADAMTS9</i>                         | ADAMTS9 is a potential biomarker for liquid biopsies in PCa.                                     |
| <i>AGR2</i>                            | AGR2 promotes metastasis in PCa.                                                                 |
| <i>AKR1C3</i>                          | AKR1C3 facilitates intratumoral androgen biosynthesis and androgen receptor activation.          |
| <i>AMACR</i>                           | AMACR has been found upregulated in various PCa databases, including the PRAD TCGA database.     |
| <i>AOX1</i>                            | AOX1 expression is correlated with biochemical recurrence.                                       |
| <i>AR</i>                              | AR-signaling drivers both castration sensitive and insensitive PCa.                              |
| <i>ARv7</i>                            | AR splice variant 7 is insensitive to available ARSIs.                                           |
| <i>BIRC5</i>                           | BIRC5 is upregulated in primary and metastatic PCa.                                              |
| <i>BMP6</i>                            | BMP6 is overexpressed in PCa and associates with invasiveness.                                   |
| <i>BRCA1</i>                           | Tumor suppressor, DNA damage response.                                                           |
| <i>BRCA2</i>                           | Tumor suppressor, DNA damage response.                                                           |
| <i>CCNE2</i>                           | CCNE2 promotes proliferation of PCa.                                                             |
| <i>DLX1</i>                            | DLX1 is a well-established biomarker for PCa.                                                    |
| <i>EN2</i>                             | EN2 is secreted in PCa but not normal prostate tissue.                                           |
| <i>EPCAM</i>                           | EPCaM is an epithelial cell marker and a putative target in CTC technologies such as CellSearch. |
| <i>ERG</i>                             | ERG overexpression modulates transcription to drive PCa development.                             |
| <i>EYA4</i>                            | Deregulated EYA4 expression promotes progression in various cancers.                             |
| <i>FAM107A</i>                         | FAM107A expression is deregulated in PCa and is potential biomarker and therapeutic target.      |
| <i>FANCA</i>                           | Germline FANCA alterations increase sensitivity to DNA damage repair agents.                     |
| <i>FAT1</i>                            | FAT1 regulates apoptosis in PCa.                                                                 |
| <i>FOLH1</i>                           | FOLH1 is expressed in AR-positive, but not in AR-negative CRPC.                                  |
| <i>FOXA1</i>                           | Facilitates AR-chromatin interactions and enables binding of AR to noncanonical sites.           |
| <i>GHR</i>                             | GHR drives PCa progression.                                                                      |
| <i>GLYATL1</i>                         | GLYATL1 is androgen regulated and upregulated in PCa.                                            |
| <i>GNMT</i>                            | GNMT promotes PCa proliferation by regulating apoptosis.                                         |
| <i>GRHL2</i>                           | GRHL2 is an AR coregulator with an essential role in the oncogenic AR signaling axis.            |
| <i>HOXB13</i>                          | HOXB13 regulates AR expression as well as AR/ARv7 chromatin binding in mCRPC.                    |
| <i>HOXC6</i>                           | HOXC6 is an androgen-independent AR cofactor.                                                    |
| <i>ITGBL1</i>                          | ITGBL1 promotes EMT, invasion and migration in PCa.                                              |
| <i>KIF11</i>                           | KIF11 is a prognostic marker for survival in mCRPC.                                              |
| <i>KIF20A</i>                          | KIF20A promotes progression to mCRPC via autocrine activation of the AR.                         |
| <i>KLK2</i>                            | Canonical target of AR signaling.                                                                |
| <i>KLK3</i>                            | Canonical target of AR signaling.                                                                |
| <i>KRT14</i>                           | KRT14 expression is a marker for basal PCa cells.                                                |
| <i>KRT5</i>                            | KRT5 positive and KRT14 negative PCa cells have a unique phenotype and are androgen independent. |
| <i>MYO6</i>                            | MYO6 promotes cellular motility and PCa cell invasiveness.                                       |
| <i>NAALADL2</i>                        | NAALADL2 promotes metastatic phenotypes in PCa.                                                  |
| <i>NKX3-1</i>                          | Collaborates with the AR in androgen dependent PCa.                                              |
| <i>PAX8</i>                            | Expression of fusion gene PAX8-GLIS3 dysregulates SHH signaling.                                 |

|                    |                                                                                                             |
|--------------------|-------------------------------------------------------------------------------------------------------------|
| <i>PCDHB2</i>      | PCDHB2 has been found upregulated in various PCa databases, including the PRAD TCGA database.               |
| <i>PMEPA1</i>      | PMEPA1 is potential biomarker and therapeutic target in PCa.                                                |
| <i>PPFIA2</i>      | PPFIA2 is a marker for aggressive PCa.                                                                      |
| <i>PRR16</i>       | PRR16 has been found upregulated in various PCa databases, including the PRAD TCGA database.                |
| <i>PRSS8</i>       | Is aberrantly expressed in PCa.                                                                             |
| <i>RORC</i>        | RORC is upregulated in mCRPC.                                                                               |
| <i>RRM2</i>        | RRM2 is involved with DNA damage repair and associates with poor clinical outcomes in PCa.                  |
| <i>SIM2</i>        | SIM2 promotes the onset and progression of PCa.                                                             |
| <i>SLC25A33</i>    | SLC25A33 promotes survival of malignant cells by preventing mitochondrial dysfunction.                      |
| <i>SOX2</i>        | SOX2 promotes metastatic progression via metabolic reprogramming.                                           |
| <i>SPOCK3</i>      | SPOCK3 expression correlates with PFS in PCa.                                                               |
| <i>SRD5A1</i>      | SRD5A1 facilitates intratumoral androgen biosynthesis and androgen receptor activation.                     |
| <i>STEAP1</i>      | STEAP1 is overexpressed in PCa and the target of many emerging immunotherapies.                             |
| <i>TDRD1</i>       | TDRD1 serves as a potential biomarker due to its overexpression in the majority of PCa cases.               |
| <i>TERT</i>        | High TERT expression associates with disease recurrence in PCa.                                             |
| <i>TFF1</i>        | Trefoil factors (TFFs) enhance proliferation, invasion, metastasis, and angiogenesis and inhibit apoptosis. |
| <i>TLCD1</i>       | TLCD1 has been found upregulated in various PCa databases, including the PRAD TCGA database.                |
| <i>TMPRSS2</i>     | TMPRSS2 drives ERG overexpression in 55% of PCa cases.                                                      |
| <i>TMPRSS2-ERG</i> | Fusion of TMPRSS2 to ERG drives ERG overexpression.                                                         |
| <i>TOP2A</i>       | TOPA2 promotes PCa progression via collaboration with the AR.                                               |
| <i>TRPM8</i>       | TRPM8 is a potential therapeutic target in androgen dependent PCa.                                          |
| <i>TUSC3</i>       | A tumor suppressor gene.                                                                                    |
| <i>VSTM2L</i>      | VSTM2L expression is prognostic in various cancers and correlates with immune cell infiltration.            |
| <i>WNT5A</i>       | WNT5A1 induces dormancy in PCa cells.                                                                       |
| <i>WNT7B</i>       | WNT7B is AR regulated and promotes androgen-independent growth in CRPC.                                     |

| <b>Table S2. Baseline blood parameters of ‘Group 1’ and ‘Group 2’</b> |                  |                 |
|-----------------------------------------------------------------------|------------------|-----------------|
| <b>Characteristic, mean (range)</b>                                   | <b>Group 1</b>   | <b>Group 2</b>  |
| Lymphocytes (10 <sup>9</sup> /L)                                      | 1.3 (0.6-2.2)    | 1.5 (0.7-2.6)   |
| Leukocytes (10 <sup>9</sup> /L)                                       | 6.7 (3-11.5)     | 9.2 (5-11.5)    |
| Neutrophils (10 <sup>9</sup> /L)                                      | 4.7 (2.1-9.6)    | 4.4 (2.5-9.6)   |
| Thrombocytes (10 <sup>9</sup> /L)                                     | 234.6 (116-359)  | 250 (119-359)   |
| Alkaline phosphatase (U/L)                                            | 334.5 (67-1866)  | 103.6 (54-229)  |
| Hb (mmol/L)                                                           | 8.0 (6.6-9.4)    | 8.3 (6.7-9.2)   |
| LD (U/L)                                                              | 283.5 (123-663)  | 202.2 (111-663) |
| PSA µg/L                                                              | 215.8 (3.6-1600) | 40.8 (1.2-130)  |
| Testosterone nmol/L                                                   | <0.4             | <0.4 (<0.4-0.7) |

**Table S3. Baseline blood parameters of 'ARSI 1' and 'ARSI 2'**

| Characteristic, mean (range)      | ARSI 1          | ARSI 2          |
|-----------------------------------|-----------------|-----------------|
| Lymphocytes (10 <sup>9</sup> /L)  | 1.3 (0.6-2)     | 1.8 (0.9-3.1)   |
| Leukocytes (10 <sup>9</sup> /L)   | 7 (4.9-9.5)     | 10.3 (4.8-68)   |
| Neutrophils (10 <sup>9</sup> /L)  | 4.9 (2.7-8.1)   | 4 (2.5-6.1)     |
| Thrombocytes (10 <sup>9</sup> /L) | 251.7 (186-323) | 257.2 (190-418) |
| Alkaline phosphatase (U/L)        | 255.3 (79-701)  | 99.9 (54-229)   |
| Hb (mmol/L)                       | 8.2 (7.3-9.4)   | 8.3 (6.7-9.2)   |
| LD (U/L)                          | 254.5 (188-317) | 188.9 (111-257) |
| PSA µg/L                          | 130.1 (6.7-470) | 39.8 (1.2-180)  |
| Testosterone nmol/L               | <0.4            | <0.4            |

**Table S4. Baseline alkaline phosphatase and PSA per therapy**

| Cohort                         | Alk Phos (U/L)  | PSA (µg/L)       |
|--------------------------------|-----------------|------------------|
| Therapy agnostic, mean (range) | 195.9 (54-1866) | 110.8 (1.2-1600) |
| ARSI, mean (range)             | 142.3 (54-701)  | 64.4 (1.2-470)   |
| Chemotherapy, mean (range)     | 208.1 (54-1016) | 81.5 (4.8-450)   |
| Immuno, mean (range)           | 120 (103-137)   | 82 (44-120)      |
| Radioligand                    | 110.3 (82-178)  | 81 (39-160)      |
| PARPi, mean (range)            | 99 (94-104)     | 120 (110-130)    |
| Active surveillance            | 715.7 (63-1866) | 557.3 (24-1600)  |

**Table S5. Healthy volunteer demographics**

| Characteristics         | Statistics |
|-------------------------|------------|
| Num. of samples         | 29         |
| Age, median (range)     | 50 (22-71) |
| Sex, Num. (%)           |            |
| Male                    | 19 (66%)   |
| Female                  | 10 (34%)   |
| Men aged > 50, Num. (%) | 9 (47%)    |
| Men aged < 50, Num. (%) | 10 (53%)   |

---

**Table S6. TSO500 PCa gene panel**

---

AKT1

---

AKT2

---

AKT3

---

AR

---

ATM

---

ATR

---

BARD1

---

BRAF

---

BRCA1

---

BRCA2

---

BRIP1

---

CCND1

---

CDK12

---

CDK4

---

CDK6

---

CDKN2A

---

CHEK1

---

CHEK2

---

ERCC2

---

FANCL

---

MAP2K1

---

MAP2K2

---

MAP2K4

---

MAP3K1

---

MLH1

---

MSH2

---

MSH6

---

NBN

---

PALB2

---

PIK3CA

---

PIK3CB

---

PIK3R1

---

PMS2

---

POLE

---

PPP2R2A

---

PTEN

---

RAD51B

---

RAD51C

---

RAD51D

---

RAD54L

---

RAF1

---

RB1

---

SPOP

---

TP53

---
